# Supplementary material for: Supplemental Insulin-Like Growth Factor-1 and Necrotizing Enterocolitis in Preterm Pigs
Source: Front Pediatr. 2021 Feb 4;8:602047. doi: 10.3389/fped.2020.602047 (PMC7891102; doi:10.3389/fped.2020.602047)
Supplement: Supplementary file 3 [file Table_3.pdf]

Supplementary table S3. Hematology of preterm pigs treated with rhIGF-1/BP-3 or vehicle\*

| Parameter                              | rhIGF-1/BP-3 | Controls     |
|----------------------------------------|--------------|--------------|
| Number of animals                      | 20           | 21           |
| Total leukocytes, 10 <sup>9</sup> /L   | 2.4 ±0.2*    | 1.8 ±0.1     |
| Total erythrocytes, 10 <sup>9</sup> /L | 3.8 ±0.1     | 3.6 ±0.1     |
| Thrombocytes, 10 <sup>9</sup> /L       | 179.2 ±11.3  | 172.4 ±13.4  |
| Neutrophils, 10 <sup>9</sup> /L        | 1.2 ±0.1*    | 0.8 ±0.1     |
| Lymphocytes, 10 <sup>9</sup> /L        | 1.1 ±0.1     | 0.9 ±0.1     |
| Monocytes, 10 <sup>9</sup> /L          | 0.04 ±0.01   | 0.03 ±0.003  |
| Eosinophils, 10 <sup>9</sup> /L        | 0.04 ±0.01   | 0.04 ±0.01   |
| Basophiles, 10 <sup>9</sup> /L         | 5e-04 ±0.001 | 0.001 ±0.001 |
| LUC, 10 <sup>9</sup> /L                | 0.01 ±0.002  | 0.01 ±0.002  |
| Hemoglobin, mmol, L                    | 5.3 ±0.1     | 5.1 ± 0.1    |
| Hematocrit, L/L                        | 0.3 ±0.01    | 0.3 ±0.05    |
| MCV, ft                                | 71.0 ±0.9    | 70.0 ±0.6    |
| MCHC, mmol/L                           | 19.8 ±0.8    | 19.9 ±0.1    |
| Mean platelet volume, ft               | 11.6 ±0.5    | 11.0 ±0.2    |
| Mean platelet count, g/L               | 227.9 ±2.3   | 226.0 ±2.4   |
| Neutrophils, %                         | 49.0 ±2.3    | 46.3 ±2.7    |
| Lymphocytes, %                         | 46.8 ±2.3    | 49.4 ±2.6    |
| Monocytes, %                           | 1.8 ±0.2     | 1.9 ±0.2     |
| Eosinophils, %                         | 1.7 ±0.2     | 1.8 ±0.3     |
| Basophils%                             | 0.08 ±0.01   | 0.15 ±0.07   |
| LUC, %                                 | 0.5 ±0.1     | 0.4 ±0.1     |

\*Values are mean ± SEM. MCV, mean corpuscular volume.

There were no statistically significant differences in the variables ( $p > 0.05$ ), except that rhIGF-1/BP-3 treatment increased leukocyte and neutrophil counts ( $p < 0.05$ ). MCHC, mean corpuscular hemoglobin concentration LUC, large unstained cells.
