# Supplementary material for: Supplemental Insulin-Like Growth Factor-1 and Necrotizing Enterocolitis in Preterm Pigs
Source: PubMed Central journal article supplement (PMC7891102; doi:10.3389/fped.2020.602047), 2021-02-04
Supplement: Table_1.pdf [file Table_1.pdf]

*Supplementary table S1. Enteral milk formula composition*

| <b>Product</b>                       | <b>Amount (g/L)</b> | <b>Supplier</b>            |
|--------------------------------------|---------------------|----------------------------|
| Calogen LCT, lipid emulsion          | 20                  | Nutricia, Allerød, Denmark |
| Liquigen MCT, lipid emulsion         | 75                  | Nutricia                   |
| Fantomalt                            | 20                  | Nutricia                   |
| Phlexy-Vits, vitamin and mineral mix | 2                   | Nutricia                   |
| Miprodan 40                          | 15                  | Arla Foods Ingredients     |
