# Supplementary material for: Supplemental Insulin-Like Growth Factor-1 and Necrotizing Enterocolitis in Preterm Pigs
Source: PubMed Central journal article supplement (PMC7891102; doi:10.3389/fped.2020.602047), 2021-02-04
Supplement: Table_2.pdf [file Table_2.pdf]

Supplementary table S2. Clinical parameters of preterm pigs treated with rhIGF-1/BP-3\*

| <b>Parameter</b>                                        | <b>rhIGF-1/BP-3</b> | <b>Controls</b> |
|---------------------------------------------------------|---------------------|-----------------|
| Number of animals                                       | 21-24               | 18-24           |
| Rectal temperature, 1 and 24 hrs after birth:           | 38.0 ±0.1           | 37.8 ±0.1       |
|                                                         | 38.2 ±0.1           | 38.2 ±0.2       |
| Clinical score, median [min; max], morning and evening: |                     |                 |
| Day 1                                                   | 1 [1; 1]            | 1 [1; 1]        |
| Day 2                                                   | 1 [1; 1]            | 1 [1; 1]        |
|                                                         | 1 [1; 1]            | 1 [1; 1]        |
| Day 3                                                   | 1 [1; 1]            | 1 [1; 1]        |
|                                                         | 1 [1; 1]            | 1 [1; 1]        |
| Day 4                                                   | 1 [1; 1]            | 1 [1; 1]        |
|                                                         | 1 [1; 2]            | 1 [1; 4]        |
| Day 5                                                   | 1 [1; 2]            | 1 [1; 4]        |
| Fecal score, median [min; max], morning and evening:    |                     |                 |
| Day 1                                                   | 1 [1; 1]            | 1 [1; 1]        |
| Day 2                                                   | 1 [1; 1]            | 1 [1; 1]        |
|                                                         | 1 [1; 2]            | 1 [1; 2]        |
| Day 3                                                   | 1 [1; 2]            | 1 [1; 2]        |
|                                                         | 1 [1; 1]            | 1 [1; 1]        |
| Day 4                                                   | 4 [1; 4]            | 4 [1; 5]        |
|                                                         | 4 [1; 4]            | 4 [1; 5]        |
| Day 5                                                   | 4 [1; 5]            | 4 [2; 5]        |

Physical activity, % activity per hour:

|                           |           |           |
|---------------------------|-----------|-----------|
| Day 2, 8 am – 8 pm        | 23.7 ±1.2 | 22.1 ±1.6 |
| Day 2, 8 pm – Day 3, 8 am | 18.8 ±1.2 | 17.9±1.4  |
| Day 3, 8 am – 8 pm        | 18.7 ±1.1 | 17.6 ±1.9 |
| Day 3, 8 pm – Day 4, 8 am | 18.1 ±1.2 | 17.9±1.4  |
| Day 4, 8 am – 8 pm        | 18.2 ±1.2 | 19.5 ±1.4 |
| Day 4, pm – Day 5, 8 am   | 16.3 ±1.4 | 16.0 ±1.4 |

---

\*Unless stated otherwise, values are mean ± SEM. There were no statistically significant differences in the variables (all  $p > 0.05$ ). The clinical assessment criteria included respiratory distress, color, lethargy, abdominal distension and skin changes, as previously described (30). Each pig was assigned a score between 1 (clinically stable) and 4 (very ill, euthanasia to be considered)
