# Supplementary material for: Supplemental Insulin-Like Growth Factor-1 and Necrotizing Enterocolitis in Preterm Pigs
Source: PubMed Central journal article supplement (PMC7891102; doi:10.3389/fped.2020.602047), 2021-02-04
Supplement: Table_4.pdf [file Table_4.pdf]

Supplementary table S4. Plasma biochemistry in 5 d-old preterm pigs treated with rhIGF-1/BP-3\* or vehicle

| <b>Parameter</b>                | <b>rhIGF-1/BP-3</b> | <b>Controls</b> |
|---------------------------------|---------------------|-----------------|
| Number of animals               | 20                  | 21              |
| Albumin g/l                     | 11.7 ±0.8           | 11.1 ±0.5       |
| Total protein g/l               | 28.3 ±0.8           | 27.9 ±0.6       |
| Alkaline phosphatase, U/l       | 1862.6 ±173.8       | 1659.0 ±180.9   |
| Alanine aminotransferase, U/l   | 28.8 ±8.8           | 22.5 ±7.5       |
| Aspartate aminotransferase, U/l | 37.5 ±11.1          | 28.8 ±6.6       |
| Bilirubin, µmol/l               | 3.8 ±0.4            | 4.3 ±0.5        |
| Cholesterol, mmol/l             | 1.9 ±0.1            | 1.8 ±0.1        |
| Creatinine, µmol/l              | 56.2 ±1.8           | 58.1 ±1.6       |
| Iron, µmol/l                    | 9.5 ±1.3            | 9.3 ±0.8        |
| Phosphate, mmol/l               | 1.8 ±0.1            | 1.8 ±0.1        |
| Blood urea nitrogen, mmol/l     | 2.1 ±0.2            | 2.2 ±0.2        |
| Gamma-glutamyltransferase, U/l  | 37.2 ±3.5           | 38.3 ±3.1       |
| Calcium, mmol/l                 | 3.3 ±0.03           | 3.3 ±0.03       |
| Magnesium, mmol/l               | 0.9 ±0.02           | 0.8 ±0.02       |
| Sodium, mmol/l                  | 148.7 ±1.2          | 149.6 ±1.0      |
| Potassium, mmol/l               | 5.3 ±0.4            | 5.1 ±0.3        |
| Glucose, mmol/l                 | 4.8 ±0.2            | 4.8 ±0.2        |
| Creatinine kinase, U/l          | 128.2 ±29.8         | 104.6 ±26.8     |

\*Values are mean±SEM. There were no statistically significant differences between the groups for any variable (all  $p > 0.05$ ).
