# Supplementary material for: Supplemental Insulin-Like Growth Factor-1 and Necrotizing Enterocolitis in Preterm Pigs
Source: PubMed Central journal article supplement (PMC7891102; doi:10.3389/fped.2020.602047), 2021-02-04
Supplement: Table_5.pdf [file Table_5.pdf]

Supplementary table S5. Macroscopic NEC scores of individual preterm 5 d-old pigs treated with rhIGF-1/BP-3 or vehicle\*

| <b>Pig nr.</b> | <b>Treatment</b> | <b>Small intestinal NEC score<br/>(highest score of proximal,<br/>middle and distal regions)</b> | <b>Stomach<br/>NEC score</b> | <b>Colon NEC score<br/>(highest score of<br/>colon and caecum)</b> |
|----------------|------------------|--------------------------------------------------------------------------------------------------|------------------------------|--------------------------------------------------------------------|
| 1              | rhIGF-1/BP-3     | 1                                                                                                | 3                            | 3                                                                  |
| 2              | rhIGF-1/BP-3     | 1                                                                                                | 3                            | 2                                                                  |
| 3              | rhIGF-1/BP-3     | 1                                                                                                | 1                            | 1                                                                  |
| 4              | rhIGF-1/BP-3     | 1                                                                                                | 1                            | 6                                                                  |
| 5              | rhIGF-1/BP-3     | 1                                                                                                | 1                            | 1                                                                  |
| 6              | rhIGF-1/BP-3     | 1                                                                                                | 1                            | 2                                                                  |
| 7              | rhIGF-1/BP-3     | 1                                                                                                | 1                            | 4                                                                  |
| 8              | rhIGF-1/BP-3     | 1                                                                                                | 1                            | 4                                                                  |
| 9              | rhIGF-1/BP-3     | 1                                                                                                | 3                            | 3                                                                  |
| 10             | rhIGF-1/BP-3     | 1                                                                                                | 1                            | 1                                                                  |
| 11             | rhIGF-1/BP-3     | 1                                                                                                | 1                            | 6                                                                  |
| 12             | rhIGF-1/BP-3     | 2                                                                                                | 1                            | 1                                                                  |
| 13             | rhIGF-1/BP-3     | 1                                                                                                | 3                            | 3                                                                  |
| 14             | rhIGF-1/BP-3     | 1                                                                                                | 1                            | 1                                                                  |
| 15             | rhIGF-1/BP-3     | 1                                                                                                | 1                            | 3                                                                  |
| 16             | rhIGF-1/BP-3     | 1                                                                                                | 1                            | 1                                                                  |
| 17             | rhIGF-1/BP-3     | 3                                                                                                | 3                            | 3                                                                  |
| 18             | rhIGF-1/BP-3     | 1                                                                                                | 1                            | 4                                                                  |
| 19             | rhIGF-1/BP-3     | 3                                                                                                | 1                            | 1                                                                  |
| 20             | rhIGF-1/BP-3     | 1                                                                                                | 1                            | 1                                                                  |
| 21             | rhIGF-1/BP-3     | 1                                                                                                | 1                            | 4                                                                  |
| 22             | rhIGF-1/BP-3     | 1                                                                                                | 1                            | 1                                                                  |
| 23             | rhIGF-1/BP-3     | 3                                                                                                | 1                            | 3                                                                  |
| 24             | rhIGF-1/BP-3     | 4                                                                                                | 1                            | 6                                                                  |
| 25             | Control          | 1                                                                                                | 3                            | 4                                                                  |
| 26             | Control          | 1                                                                                                | 1                            | 6                                                                  |
| 27             | Control          | 5                                                                                                | 5                            | 5                                                                  |
| 28             | Control          | 2                                                                                                | 1                            | 3                                                                  |
| 29             | Control          | 1                                                                                                | 1                            | 3                                                                  |
| 30             | Control          | 1                                                                                                | 3                            | 4                                                                  |
| 31             | Control          | 1                                                                                                | 5                            | 6                                                                  |
| 32             | Control          | 1                                                                                                | 5                            | 4                                                                  |
| 33             | Control          | 2                                                                                                | 6                            | 4                                                                  |
| 34             | Control          | 6                                                                                                | 6                            | 6                                                                  |
| 35             | Control          | 1                                                                                                | 1                            | 1                                                                  |
| 36             | Control          | 1                                                                                                | 3                            | 4                                                                  |
| 37             | Control          | 6                                                                                                | 1                            | 5                                                                  |
| 38             | Control          | 3                                                                                                | 2                            | 1                                                                  |
| 39             | Control          | 1                                                                                                | 1                            | 4                                                                  |
| 40             | Control          | 1                                                                                                | 1                            | 4                                                                  |

|    |         |   |   |   |
|----|---------|---|---|---|
| 41 | Control | 1 | 1 | 1 |
| 42 | Control | 1 | 1 | 3 |
| 43 | Control | 2 | 1 | 4 |
| 44 | Control | 1 | 3 | 4 |
| 45 | Control | 1 | 1 | 4 |
| 46 | Control | 1 | 1 | 1 |
| 47 | Control | 2 | 1 | 1 |
| 48 | Control | 1 | 1 | 4 |

\*NEC scores for individual pigs across gut regions: 1 = absence of lesions, 2 = local hyperaemia, 3 = hyperaemia, extensive edema and local haemorrhage, 4 = extensive hemorrhage, 5 = local necrosis and/or pneumatosis intestinalis, 6 = extensive necrosis and/or pneumatosis intestinalis. NEC was defined as a score of minimum 3, whereas severe NEC was defined as a score of minimum 4.
